# Supplementary material for: Bone marrow-targeted delivery of canonical lipolytic receptor agonists via neutrophil hitchhiking reverses osteoporosis
Source: Research Square preprint supplement (doi:10.21203/rs.3.rs-7569697/v1), 2025-09-25
Supplement: Supplementary file 1 [file 6945f00c0c37a705ef1e5216.docx]

**Supporting Information**

**Supplementary Fig. 1 Angiogenic parameters in HUVEC tube formation assays.**

**Supplementary Fig. 2 The cumulative release of CL from PLGA nanoparticles.**

**Supplementary Fig. 3 Flow cytometry analysis and MFI quantification of CXCR4 expression dynamics on cultured CL-NPs@NEs.**

**Supplementary Fig. 4 NEs and CL-NPs@NEs chemotaxis in vitro.**

**Supplementary Fig. 1**

**
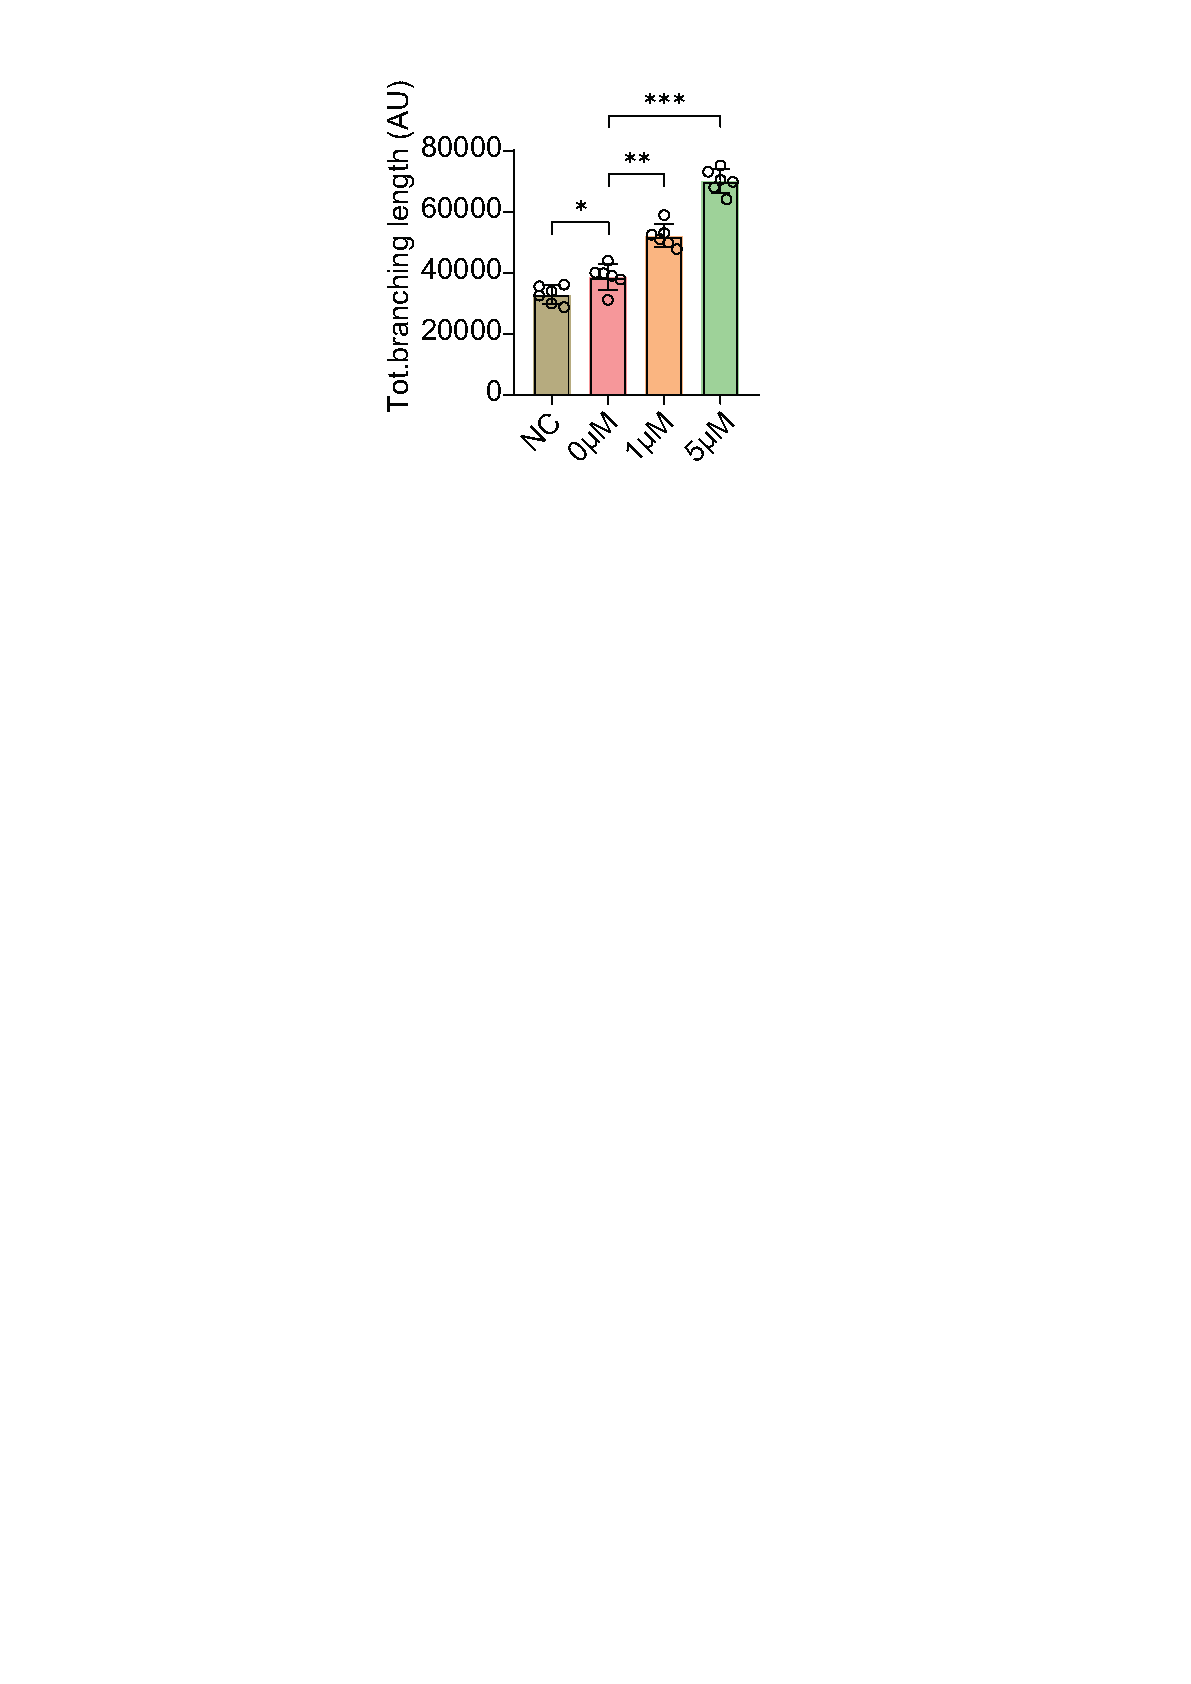
**

**Supplementary Fig. 1 Angiogenic parameters in HUVEC tube formation assays.** n = 6. All error bars are expressed as mean ± SD.

**Supplementary Fig. 2**


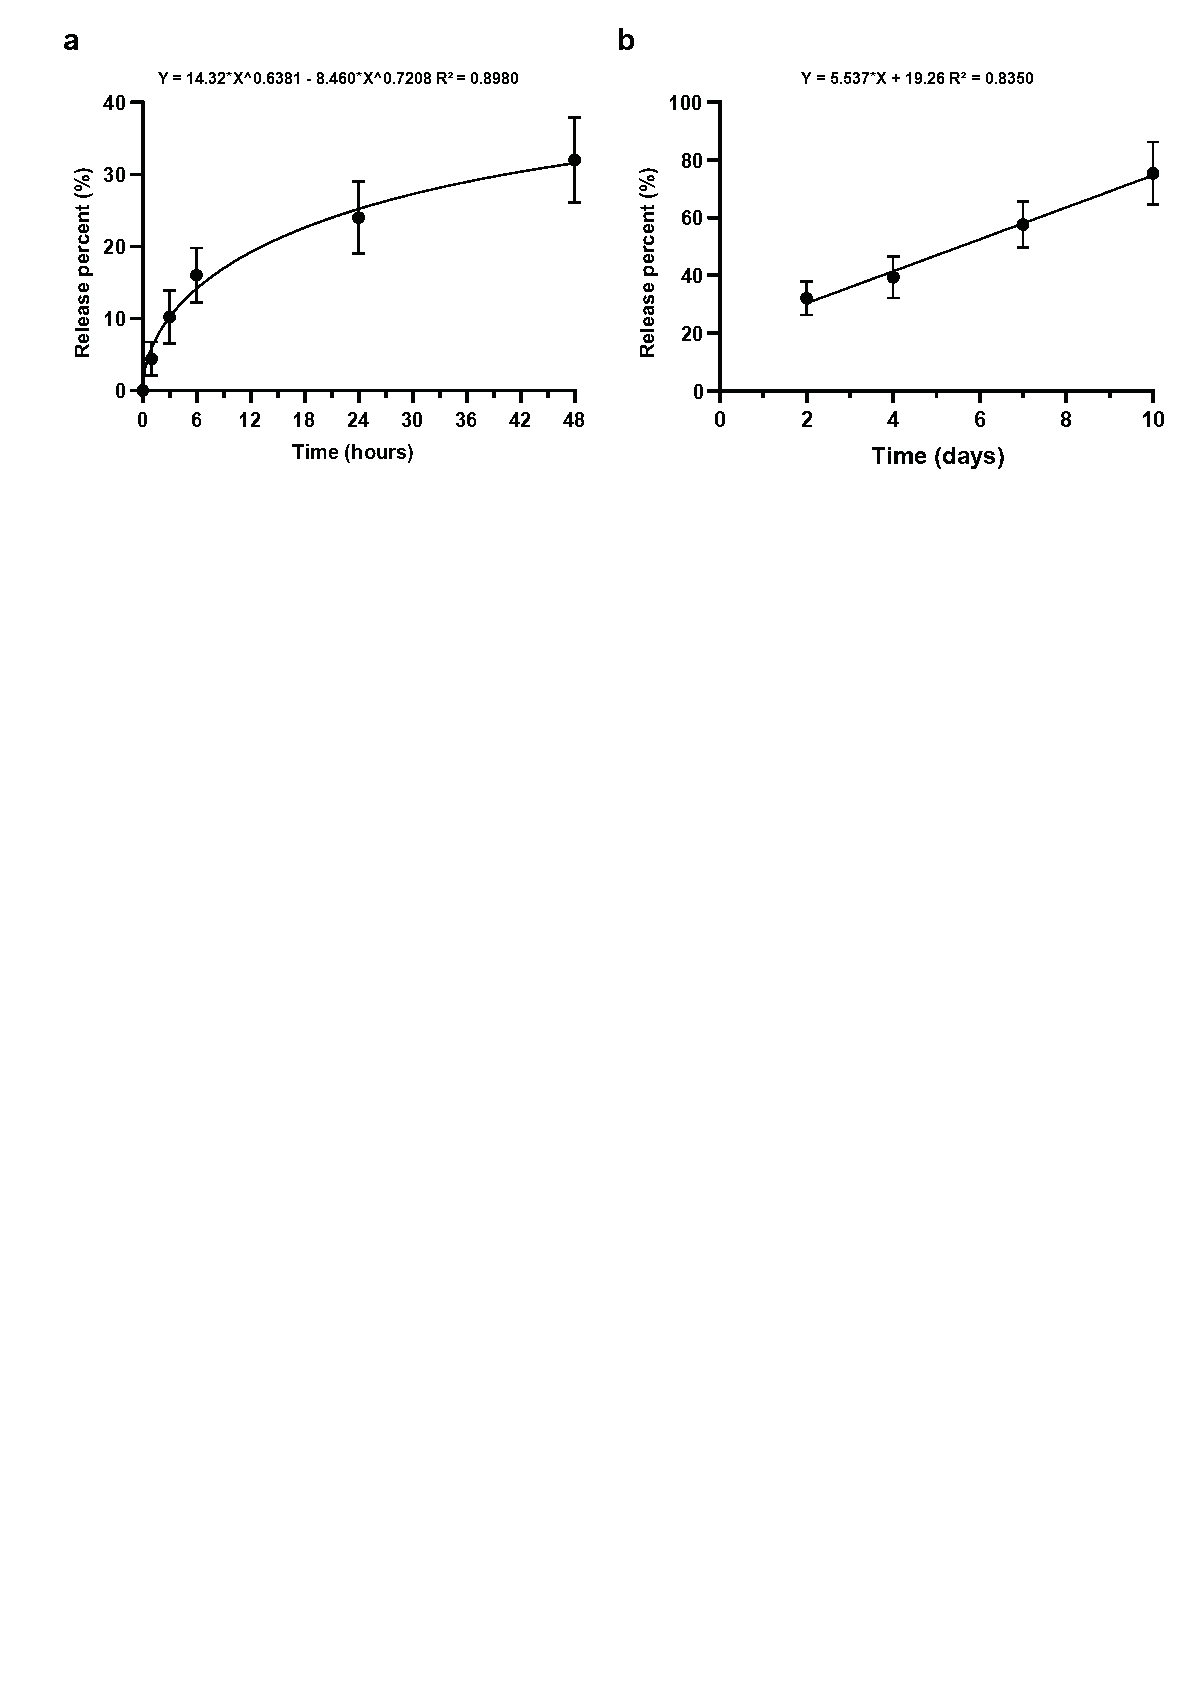


**Supplementary Fig. 2 The cumulative release of CL from PLGA nanoparticles. (a)** 0-48 h. **(b)** 2-10 d. n=5. All error bars are expressed as mean ± SD.

**Supplementary Fig. 3**


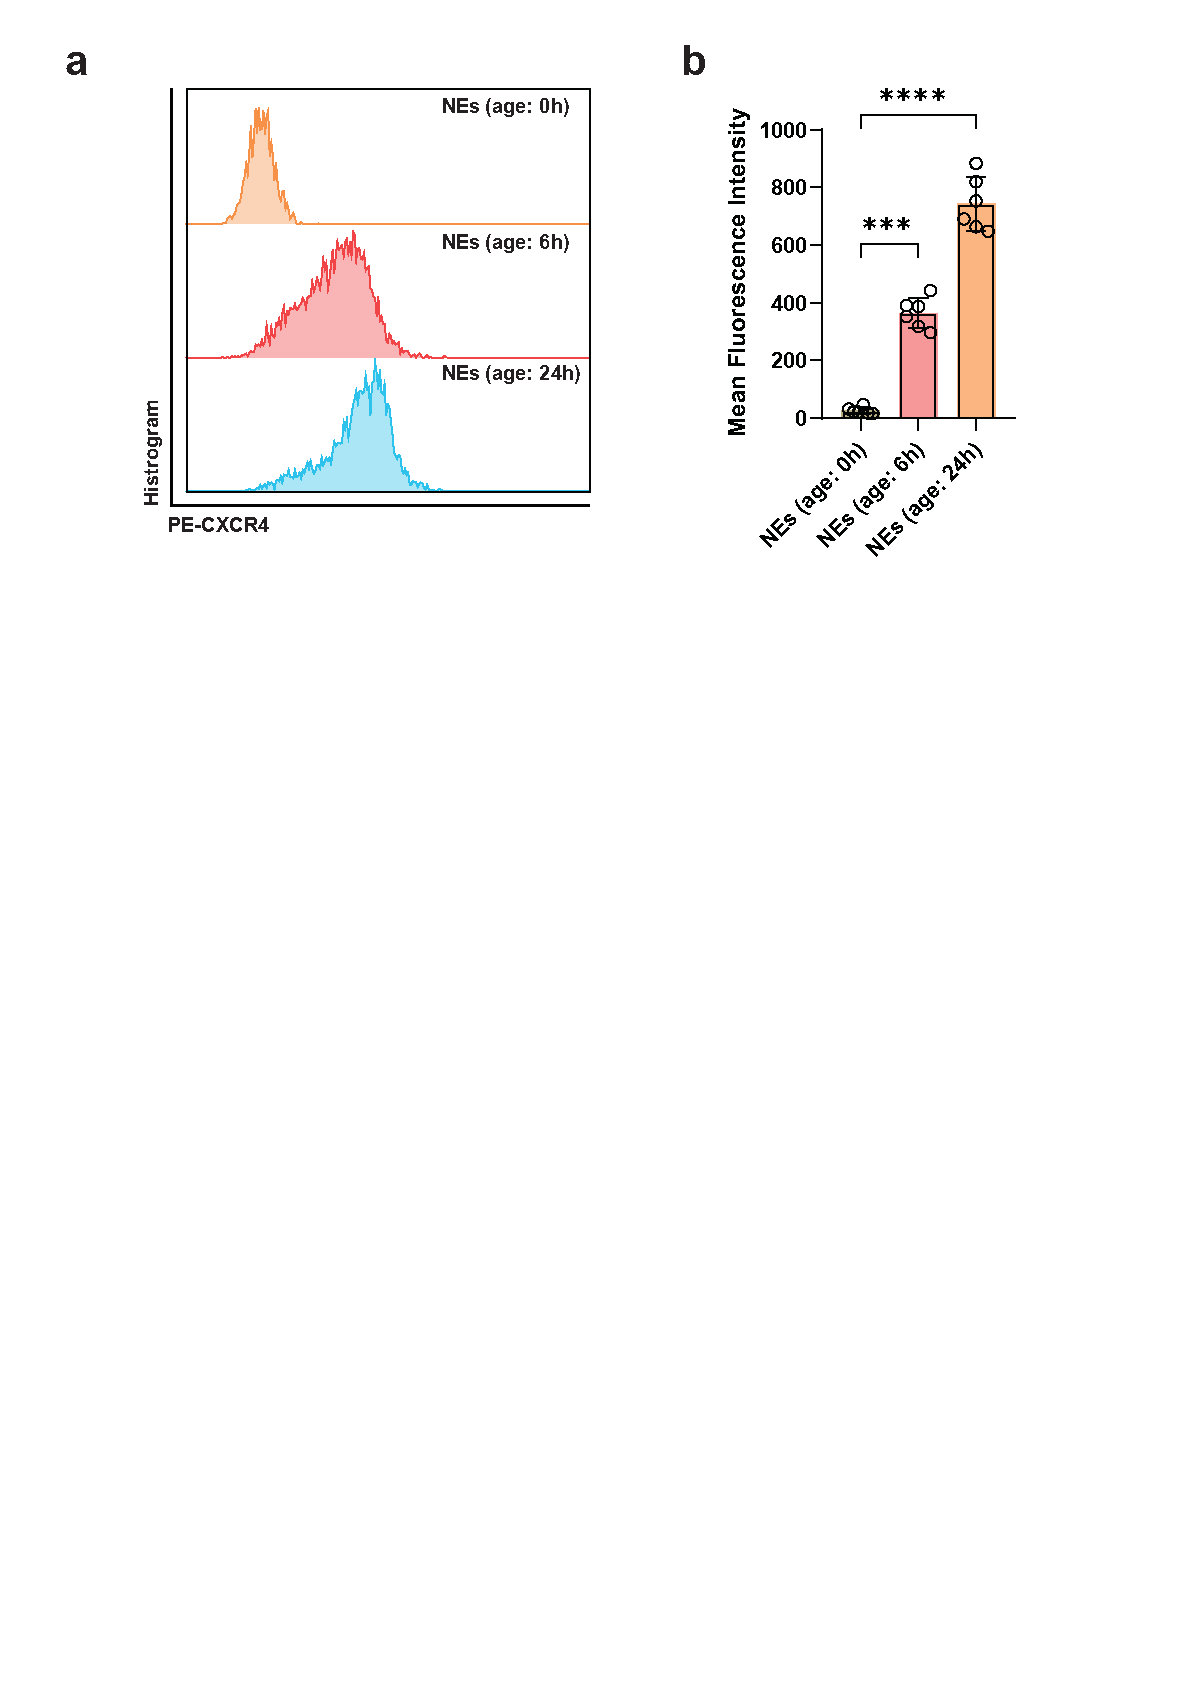


**Supplementary Fig. 3 Flow cytometry analysis and MFI quantification of CXCR4 expression dynamics on cultured CL-NPs@NEs** (n = 6).

**Supplementary Fig. 4**

**
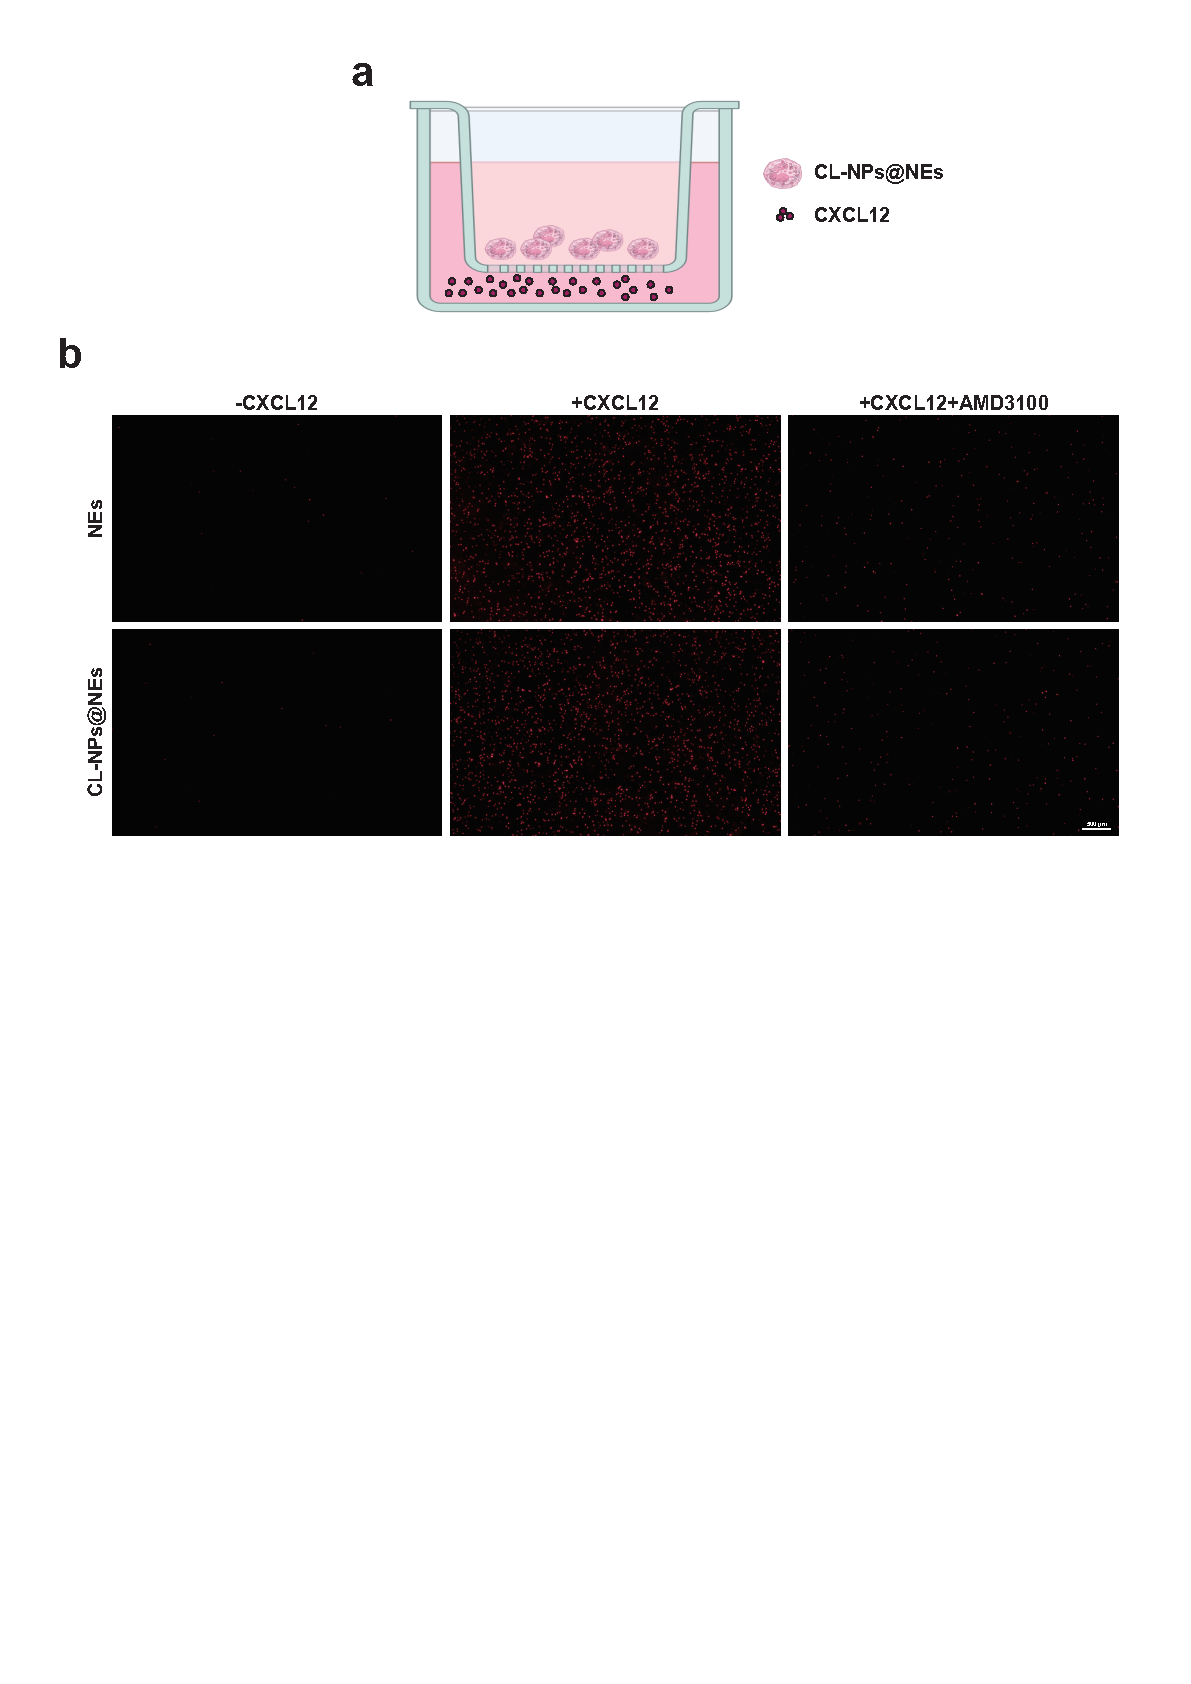
Supplementary Fig. 4 NEs and CL-NPs@NEs chemotaxis in vitro. (a)** Schematic of NEs and CL-NPs@NEs chemotaxis in vitro. **(b)** Representative confocal images showing DiD labeled neutrophils migrating toward CXCL12. Scale bar: 500 μm.
